# Supplementary material
Source: PubMed Central journal article supplement (PMC4195553)
Supplement: supp_mcu093_mcu093supp.pdf [file supp_mcu093_mcu093supp.pdf]

## SUPPLEMENTARY DATA

TABLE S1. List of primers used for the RT-qPCR.

| Primer name     | Forward primers                | Reverse primers                |
|-----------------|--------------------------------|--------------------------------|
| SIA2-1-flanking | 5'-CAAATGGAAAGATCCCAAGTCTGG-3' | 5'-CCCATCCATTTGGTAAGGCA-3'     |
| SIA2-2-flanking | 5'-CCTGGAAATCACGAAGCTGA-3'     | 5'-GACTCGTAGAGATTAGAGACGC-3'   |
| SIA2-3'UTR      | 5'-GCGCCATTGTTAGGAGTTGA-3'     | 5'-GCTTTGTTCTCTTTCAGTCCTCT-3'  |
| At3g28750       | 5'-AGGCGATGGTTATTGCACAAGC-3'   | 5'-TGCCCAACTTAACAGCGAGGTC-3'   |
| At3g57690       | 5'-AAGAAGATTGCTTGCGGTGTGC-3'   | 5'-AAAGAGCCAAGAGCTGGCAACG-3'   |
| At5g59370       | 5'-GCAGATGTGGATTGCGAAAGCAG-3'  | 5'-CCGTCTTCGTTTGGTGATCTTAGG-3' |
